# Supplementary material for: Exosome-Derived microRNAs in Hypertrophic Cardiomyopathy
Source: Preprints.org preprint supplement (doi:10.20944/preprints202409.1798.v1), 2024-09-24
Supplement: Supplementary file 1 [file supplementary]

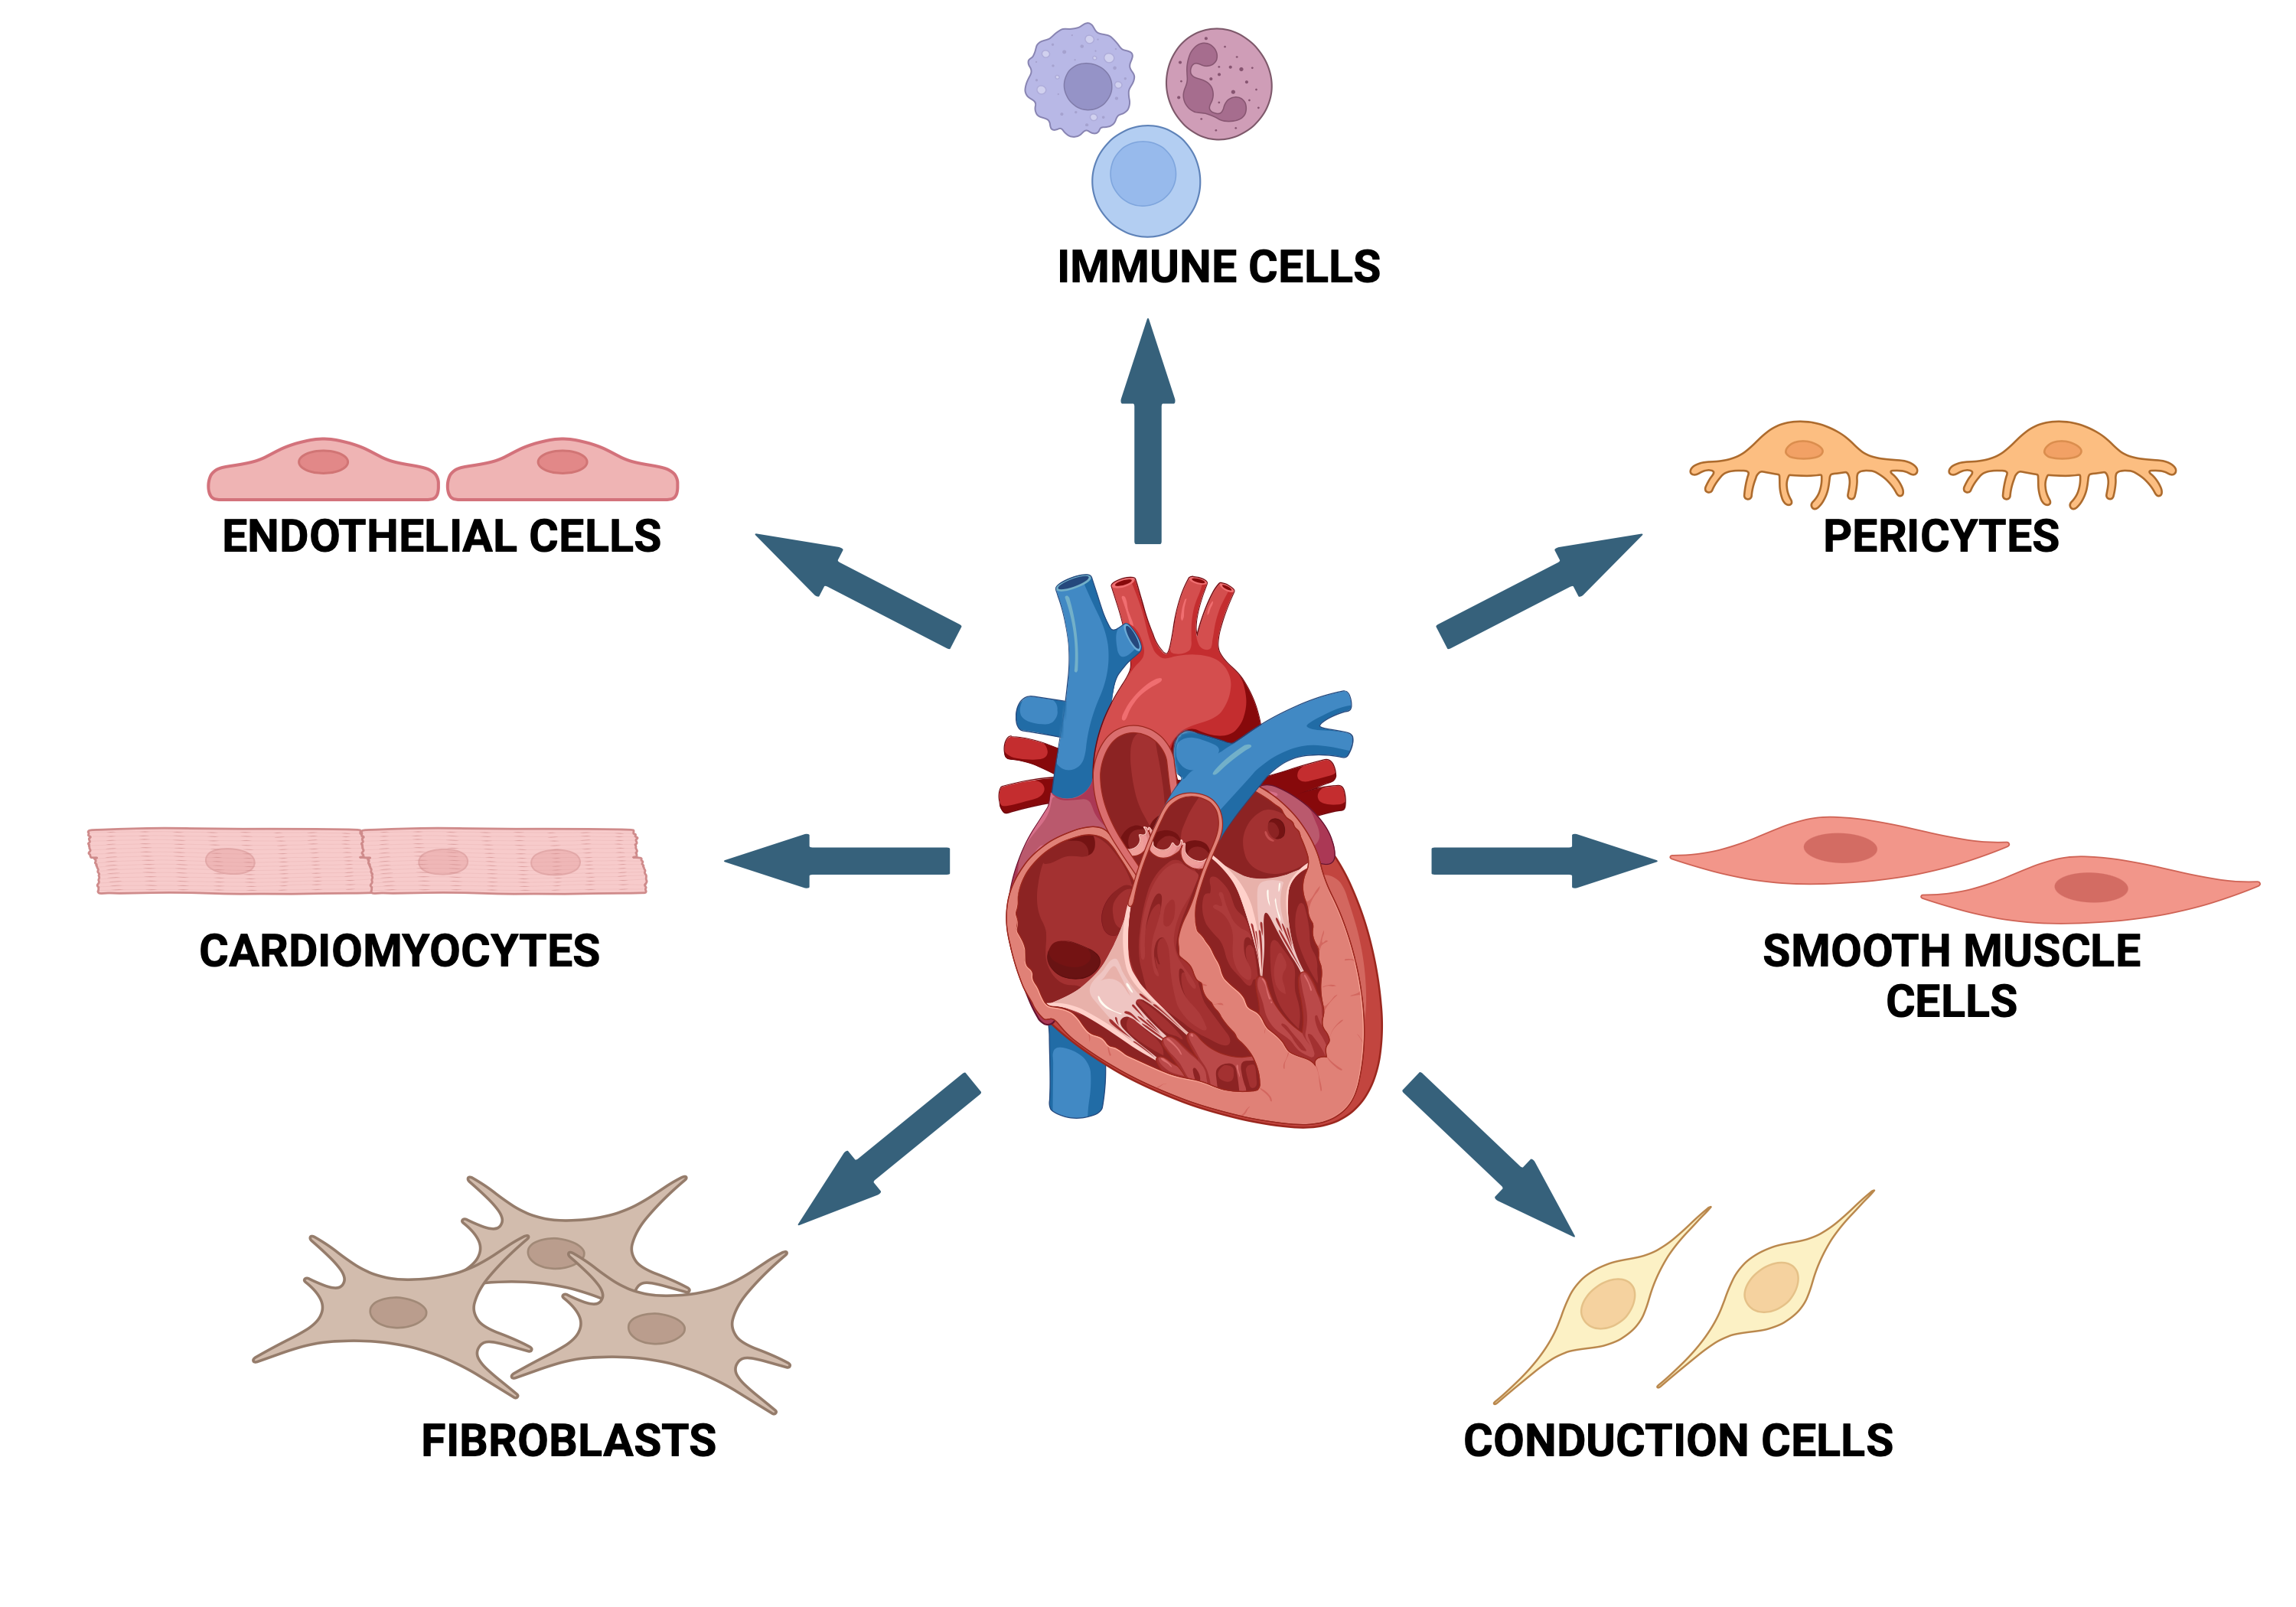


**Graphical abstract: microRNAs are released from all cell types in the myocardium.** These have the ability to modulate the phenotype in the adult healthy myocardium and the changes that occur in hypertrophic cardiomyopathy.
